# Supplementary material for: Accelerating with FlyBrainLab the discovery of the functional logic of the Drosophila brain in the connectomic and synaptomic era
Source: eLife journal article supplement (doi:10.7554/elife.62362), 2021-02-22
Supplement: supp [file elife-62362-supp-v1.zip]

Archive with 14 entries (14 files):
- elife_poa_e62362_Transparent_Reporting_File.pdf
- elife_poa_e62362_Appendix_1_figure_1.pdf
- elife_poa_e62362_Appendix_4_figure_1.png
- elife_poa_e62362_Appendix_4_figure_2.png
- elife_poa_e62362_Appendix_4_figure_3.png
- elife_poa_e62362_Appendix_4_figure_4.png
- elife_poa_e62362_Appendix_4_figure_5.png
- elife_poa_e62362_Appendix_4_figure_6.png
- elife_poa_e62362_Appendix_4_figure_7.png
- elife_poa_e62362_Appendix_4_figure_8.png
- elife_poa_e62362_Appendix_4_figure_9.png
- elife_poa_e62362_Appendix_4_figure_10.png
- elife_poa_e62362_Video_1.mp4
- elife_poa_e62362_Supplementary_file_1.xlsx
