# Supplementary material for: Accelerating with FlyBrainLab the discovery of the functional logic of the Drosophila brain in the connectomic and synaptomic era
Source: eLife journal article supplement (doi:10.7554/elife.62362), 2021-02-22
Supplement: supp [file elife-62362-supp-v1.zip › elife_poa_e62362_Supplementary_file_1.xlsx]

## Sheet: CX
	FlyCircuit Neuron	Model A	Model B	Model C
PB local neuron	Cha-F-200393	PB/L9/b-PB/L[4-8]/s	PB/L9/b-PB/L[6-8]/s	-
	Gad1-F-100361	PB/L8|R1|R9/b-PB/LR[1-9]/s	PB/L8|R1|R9/b-PB/LR[1-9]/s	-
	VGlut-F-000312	PB/L8|R1|R9/b-PB/LR[1-9]/s	PB/L8|R1|R9/b-PB/LR[1-9]/s	-
	VGlut-F-400232	PB/L8|R1|R9/b-PB/LR[1-9]/s	PB/L8|R1|R9/b-PB/LR[1-9]/s	-
	Cha-F-000089	PB/L8|R1|R9/b-PB/LR[1-9]/s	PB/L8|R1|R9/b-PB/LR[1-9]/s	-
	Cha-F-100415	PB/L7|R2/b-PB/LR[1-9]/s	PB/L7|R2/b-PB/LR[1-9]/s	-
	Gad1-F-400136	PB/L7|R2/b-PB/LR[1-9]/s	PB/L7|R2/b-PB/LR[1-9]/s	-
	VGlut-F-200001	PB/L7|R2/b-PB/LR[1-9]/s	PB/L7|R2/b-PB/LR[1-9]/s	-
	Gad1-F-200319	PB/L7|R2/b-PB/LR[1-9]/s	PB/L7|R2/b-PB/LR[1-9]/s	-
	VGlut-F-800255	PB/L7|R2/b-PB/LR[1-9]/s	PB/L7|R2/b-PB/LR[1-9]/s	-
	VGlut-F-400604	PB/L7|R2/b-PB/LR[1-9]/s	PB/L7|R2/b-PB/LR[1-9]/s	-
	VGlut-F-400888	PB/L6|R3/b-PB/LR[1-9]/s	PB/L6|R3/b-PB/LR[1-9]/s	-
	Gad1-F-900105	PB/L6|R3/b-PB/LR[1-9]/s	PB/L6|R3/b-PB/LR[1-9]/s	-
	Cha-F-200125	PB/L6|R3/b-PB/LR[1-9]/s	PB/L6|R3/b-PB/LR[1-9]/s	-
	VGlut-F-200570	PB/L6|R3/b-PB/LR[1-9]/s	PB/L6|R3/b-PB/LR[1-9]/s	-
	VGlut-F-900033	PB/L6|R3/b-PB/LR[1-9]/s	PB/L6|R3/b-PB/LR[1-9]/s	-
	Gad1-F-200397	PB/L6|R3/b-PB/LR[1-9]/s	PB/L6|R3/b-PB/LR[1-9]/s	-
	VGlut-F-300488	PB/L5|R4/b-PB/LR[1-9]/s	PB/L5|R4/b-PB/LR[1-9]/s	-
	Cha-F-400263	PB/L5|R4/b-PB/LR[1-9]/s	PB/L5|R4/b-PB/LR[1-9]/s	-
	VGlut-F-600765	PB/L5|R4/b-PB/LR[1-9]/s	PB/L5|R4/b-PB/LR[1-9]/s	-
	Gad1-F-400111	PB/L5|R4/b-PB/LR[1-9]/s	PB/L5|R4/b-PB/LR[1-9]/s	-
	VGlut-F-000634	PB/R5|L4/b-PB/LR[1-9]/s	PB/R5|L4/b-PB/LR[1-9]/s	-
	Cha-F-900016	PB/R5|L4/b-PB/LR[1-9]/s	PB/R5|L4/b-PB/LR[1-9]/s	-
	Cha-F-300305	PB/R5|L4/b-PB/LR[1-9]/s	PB/R5|L4/b-PB/LR[1-9]/s	-
	Gad1-F-600267	PB/R5|L4/b-PB/LR[1-9]/s	PB/R5|L4/b-PB/LR[1-9]/s	-
	VGlut-F-100093	PB/R5|L4/b-PB/LR[1-9]/s	PB/R5|L4/b-PB/LR[1-9]/s	-
	VGlut-F-500797	PB/R5|L4/b-PB/LR[1-9]/s	PB/R5|L4/b-PB/LR[1-9]/s	-
	Cha-F-200148	PB/R5|L4/b-PB/LR[1-9]/s	PB/R5|L4/b-PB/LR[1-9]/s	-
	VGlut-F-100082	PB/R6|L3/b-PB/LR[1-9]/s	PB/R6|L3/b-PB/LR[1-9]/s	-
	Cha-F-200130	PB/R6|L3/b-PB/LR[1-9]/s	PB/R6|L3/b-PB/LR[1-9]/s	-
	Gad1-F-500016	PB/R6|L3/b-PB/LR[1-9]/s	PB/R6|L3/b-PB/LR[1-9]/s	-
	VGlut-F-500773	PB/R6|L3/b-PB/LR[1-9]/s	PB/R6|L3/b-PB/LR[1-9]/s	-
	VGlut-F-000587	PB/R6|L3/b-PB/LR[1-9]/s	PB/R6|L3/b-PB/LR[1-9]/s	-
	Cha-F-400031	PB/R6|L3/b-PB/LR[1-9]/s	PB/R6|L3/b-PB/LR[1-9]/s	-
	VGlut-F-100064	PB/R7|L2/b-PB/LR[1-9]/s	PB/R7|L2/b-PB/LR[1-9]/s	-
	Cha-F-000517	PB/R7|L2/b-PB/LR[1-9]/s	PB/R7|L2/b-PB/LR[1-9]/s	-
	Gad1-F-400256	PB/R7|L2/b-PB/LR[1-9]/s	PB/R7|L2/b-PB/LR[1-9]/s	-
	VGlut-F-000379	PB/R7|L2/b-PB/LR[1-9]/s	PB/R7|L2/b-PB/LR[1-9]/s	-
	VGlut-F-200534	PB/R7|L2/b-PB/LR[1-9]/s	PB/R7|L2/b-PB/LR[1-9]/s	-
	Cha-F-600063	PB/R7|L2/b-PB/LR[1-9]/s	PB/R7|L2/b-PB/LR[1-9]/s	-
	VGlut-F-600229	PB/R8|L1|L9/b-PB/LR[1-9]/s	PB/R8|L1|L9/b-PB/LR[1-9]/s	-
	VGlut-F-000653	PB/R8|L1|L9/b-PB/LR[1-9]/s	PB/R8|L1|L9/b-PB/LR[1-9]/s	-
	Gad1-F-900199	PB/R8|L1|L9/b-PB/LR[1-9]/s	PB/R8|L1|L9/b-PB/LR[1-9]/s	-
	VGlut-F-000156	PB/R8|L1|L9/b-PB/LR[1-9]/s	PB/R8|L1|L9/b-PB/LR[1-9]/s	-
	Gad1-F-000141	PB/R8|L1|L9/b-PB/LR[1-9]/s	PB/R8|L1|L9/b-PB/LR[1-9]/s	-
	VGlut-F-200321	PB/R8|L1|L9/b-PB/LR[1-9]/s	PB/R8|L1|L9/b-PB/LR[1-9]/s	-
	Cha-F-000468	PB/R8|L1|L9/b-PB/LR[1-9]/s	PB/R8|L1|L9/b-PB/LR[1-9]/s	-
	None	PB/R9/b-PB/R[4-8]/s	PB/R9/b-PB/R[6-8]/s	-
EB-LAL-PB	E0585-F-100029	EB/L8/s-EB/L8/b-LAL/RDG/b-PB/L9/b	EB/L8/s-LAL/RDG/b-PB/L9/b	EB/L8/s-LAL/RDG/b-PB/L9/b
	E0585-F-100028	EB/L8|L6/s-EB/L7/b-LAL/RVG/b-PB/L8/b	EB/L6|L7/s-LAL/RVG/b-PB/L8/b	EB/L6|L7|L8/s-LAL/RVG/b-PB/L8/b
	E0585-F-300015	EB/L6|L4/s-EB/L5/b-LAL/RDG/b-PB/L7/b	EB/L4|L5/s-LAL/RDG/b-PB/L7/b	EB/L4|L5|L6/s-LAL/RDG/b-PB/L7/b
	E0585-F-300021	EB/L4|L2/s-EB/L3/b-LAL/RVG/b-PB/L6/b	EB/L2|L3/s-LAL/RVG/b-PB/L6/b	EB/L2|L3|L4/s-LAL/RVG/b-PB/L6/b
	E0585-F-300037	EB/L4|L2/s-EB/L3/b-LAL/RVG/b-PB/L6/b	EB/L2|L3/s-LAL/RVG/b-PB/L6/b	EB/L2|L3|L4/s-LAL/RVG/b-PB/L6/b
	Cha-F-800085	EB/L2|R1/s-EB/L1/b-LAL/RDG/b-PB/L5/b	EB/L1|R1/s-LAL/RDG/b-PB/L5/b	EB/L1|L2|R1/s-LAL/RDG/b-PB/L5/b
	E0585-F-300003	EB/L2|R1/s-EB/L1/b-LAL/RDG/b-PB/L5/b	EB/L1|R1/s-LAL/RDG/b-PB/L5/b	EB/L1|L2|R1/s-LAL/RDG/b-PB/L5/b
	E0585-F-300004	EB/L2|R1/s-EB/L1/b-LAL/RDG/b-PB/L5/b	EB/L1|R1/s-LAL/RDG/b-PB/L5/b	EB/L1|L2|R1/s-LAL/RDG/b-PB/L5/b
	E0585-F-300017	EB/L2|R1/s-EB/L1/b-LAL/RDG/b-PB/L5/b	EB/L1|R1/s-LAL/RDG/b-PB/L5/b	EB/L1|L2|R1/s-LAL/RDG/b-PB/L5/b
	E0585-F-400022	EB/L2|R1/s-EB/L1/b-LAL/RDG/b-PB/L5/b	EB/L1|R1/s-LAL/RDG/b-PB/L5/b	EB/L1|L2|R1/s-LAL/RDG/b-PB/L5/b
	E0585-F-100015	EB/R1|R3/s-EB/R2/b-LAL/RVG/b-PB/L4/b	EB/R2|R3/s-LAL/RVG/b-PB/L4/b	EB/R1|R2|R3/s-LAL/RVG/b-PB/L4/b
	E0585-F-300006	EB/R1|R3/s-EB/R2/b-LAL/RVG/b-PB/L4/b	EB/R2|R3/s-LAL/RVG/b-PB/L4/b	EB/R1|R2|R3/s-LAL/RVG/b-PB/L4/b
	E0585-F-300057	EB/R1|R3/s-EB/R2/b-LAL/RVG/b-PB/L4/b	EB/R2|R3/s-LAL/RVG/b-PB/L4/b	EB/R1|R2|R3/s-LAL/RVG/b-PB/L4/b
	Gad1-F-600084	EB/R1|R3/s-EB/R2/b-LAL/RVG/b-PB/L4/b	EB/R2|R3/s-LAL/RVG/b-PB/L4/b	EB/R1|R2|R3/s-LAL/RVG/b-PB/L4/b
	Cha-F-100322	EB/R3|R5/s-EB/R4/b-LAL/RDG/b-PB/L3/b	EB/R4|R5/s-LAL/RDG/b-PB/L3/b	EB/R3|R4|R5/s-LAL/RDG/b-PB/L3/b
	E0585-F-300027	EB/R3|R5/s-EB/R4/b-LAL/RDG/b-PB/L3/b	EB/R4|R5/s-LAL/RDG/b-PB/L3/b	EB/R3|R4|R5/s-LAL/RDG/b-PB/L3/b
	E0585-F-400006	EB/R3|R5/s-EB/R4/b-LAL/RDG/b-PB/L3/b	EB/R4|R5/s-LAL/RDG/b-PB/L3/b	EB/R3|R4|R5/s-LAL/RDG/b-PB/L3/b
	None	EB/R5|R7/s-EB/R6/b-LAL/RVG/b-PB/L2/b	EB/R6|R7/s-LAL/RVG/b-PB/L2/b	EB/R5|R6|R7/s-LAL/RVG/b-PB/L2/b
	None	EB/R7|L8/s-EB/R8/b-LAL/RDG/b-PB/L1|R1/b	EB/R8|L8/s-LAL/RDG/b-PB/L1/b	EB/R7|R8|L8/s-LAL/RDG/b-PB/L1/b
	Cha-F-500046	EB/L7|R8/s-EB/L8/b-lal/LDG/b-PB/R1|L1/b	EB/L8|R8/s-lal/LDG/b-PB/R1/b	EB/L7|L8|R8/s-lal/LDG/b-PB/R1/b
	E0585-F-300008	EB/L7|R8/s-EB/L8/b-lal/LDG/b-PB/R1|L1/b	EB/L8|R8/s-lal/LDG/b-PB/R1/b	EB/L7|L8|R8/s-lal/LDG/b-PB/R1/b
	E0585-F-300045	EB/L7|R8/s-EB/L8/b-lal/LDG/b-PB/R1|L1/b	EB/L8|R8/s-lal/LDG/b-PB/R1/b	EB/L7|L8|R8/s-lal/LDG/b-PB/R1/b
	None	EB/L5|L7/s-EB/L6/b-lal/LVG/b-PB/R2/b	EB/L6|L7/s-lal/LVG/b-PB/R2/b	EB/L5|L6|L7/s-lal/LVG/b-PB/R2/b
	E0585-F-000003	EB/L3|L5/s-EB/L4/b-lal/LDG/b-PB/R3/b	EB/L4|L5/s-lal/LDG/b-PB/R3/b	EB/L3|L4|L5/s-lal/LDG/b-PB/R3/b
	E0585-F-400014	EB/L3|L5/s-EB/L4/b-lal/LDG/b-PB/R3/b	EB/L4|L5/s-lal/LDG/b-PB/R3/b	EB/L3|L4|L5/s-lal/LDG/b-PB/R3/b
	E0585-F-400032	EB/L3|L5/s-EB/L4/b-lal/LDG/b-PB/R3/b	EB/L4|L5/s-lal/LDG/b-PB/R3/b	EB/L3|L4|L5/s-lal/LDG/b-PB/R3/b
	None	EB/L1|L3/s-EB/L2/b-lal/LVG/b-PB/R4/b	EB/L2|L3/s-lal/LVG/b-PB/R4/b	EB/L1|L2|L3/s-lal/LVG/b-PB/R4/b
	E0585-F-200012	EB/R2|L1/s-EB/R1/b-lal/LDG/b-PB/R5/b	EB/R1|L1/s-lal/LDG/b-PB/R5/b	EB/R1|R2|L1/s-lal/LDG/b-PB/R5/b
	E0585-F-300012	EB/R2|L1/s-EB/R1/b-lal/LDG/b-PB/R5/b	EB/R1|L1/s-lal/LDG/b-PB/R5/b	EB/R1|R2|L1/s-lal/LDG/b-PB/R5/b
	E0585-F-300055	EB/R2|L1/s-EB/R1/b-lal/LDG/b-PB/R5/b	EB/R1|L1/s-lal/LDG/b-PB/R5/b	EB/R1|R2|L1/s-lal/LDG/b-PB/R5/b
	E0585-F-300025	EB/R4|R2/s-EB/R3/b-lal/LVG/b-PB/R6/b	EB/R2|R3/s-lal/LVG/b-PB/R6/b	EB/R2|R3|R4/s-lal/LVG/b-PB/R6/b
	E0585-F-300048	EB/R4|R2/s-EB/R3/b-lal/LVG/b-PB/R6/b	EB/R2|R3/s-lal/LVG/b-PB/R6/b	EB/R2|R3|R4/s-lal/LVG/b-PB/R6/b
	E0585-F-400004	EB/R4|R2/s-EB/R3/b-lal/LVG/b-PB/R6/b	EB/R2|R3/s-lal/LVG/b-PB/R6/b	EB/R2|R3|R4/s-lal/LVG/b-PB/R6/b
	E0585-F-700000	EB/R4|R2/s-EB/R3/b-lal/LVG/b-PB/R6/b	EB/R2|R3/s-lal/LVG/b-PB/R6/b	EB/R2|R3|R4/s-lal/LVG/b-PB/R6/b
	Cha-F-400136	EB/R6|R4/s-EB/R5/b-lal/LDG/b-PB/R7/b	EB/R4|R5/s-lal/LDG/b-PB/R7/b	EB/R4|R5|R6/s-lal/LDG/b-PB/R7/b
	Cha-F-000327	EB/R8|R6/s-EB/R7/b-lal/LVG/b-PB/R8/b	EB/R6|R7/s-lal/LVG/b-PB/R8/b	EB/R6|R7|R8/s-lal/LVG/b-PB/R8/b
	E0585-F-100007	EB/R8|R6/s-EB/R7/b-lal/LVG/b-PB/R8/b	EB/R6|R7/s-lal/LVG/b-PB/R8/b	EB/R6|R7|R8/s-lal/LVG/b-PB/R8/b
	E0585-F-100013	EB/R8|R6/s-EB/R7/b-lal/LVG/b-PB/R8/b	EB/R6|R7/s-lal/LVG/b-PB/R8/b	EB/R6|R7|R8/s-lal/LVG/b-PB/R8/b
	E0585-F-100031	EB/R8|R6/s-EB/R7/b-lal/LVG/b-PB/R8/b	EB/R6|R7/s-lal/LVG/b-PB/R8/b	EB/R6|R7|R8/s-lal/LVG/b-PB/R8/b
	E0585-F-200008	EB/R8|R6/s-EB/R7/b-lal/LVG/b-PB/R8/b	EB/R6|R7/s-lal/LVG/b-PB/R8/b	EB/R6|R7|R8/s-lal/LVG/b-PB/R8/b
	E0585-F-200010	EB/R8|R6/s-EB/R7/b-lal/LVG/b-PB/R8/b	EB/R6|R7/s-lal/LVG/b-PB/R8/b	EB/R6|R7|R8/s-lal/LVG/b-PB/R8/b
	E0585-F-300001	EB/R8|R6/s-EB/R7/b-lal/LVG/b-PB/R8/b	EB/R6|R7/s-lal/LVG/b-PB/R8/b	EB/R6|R7|R8/s-lal/LVG/b-PB/R8/b
	E0585-F-300014	EB/R8|R6/s-EB/R7/b-lal/LVG/b-PB/R8/b	EB/R6|R7/s-lal/LVG/b-PB/R8/b	EB/R6|R7|R8/s-lal/LVG/b-PB/R8/b
	E0585-F-400000	EB/R8|R6/s-EB/R7/b-lal/LVG/b-PB/R8/b	EB/R6|R7/s-lal/LVG/b-PB/R8/b	EB/R6|R7|R8/s-lal/LVG/b-PB/R8/b
	E0585-F-200000	EB/R8/s-EB/R8/b-lal/LDG/b-PB/R9/b	EB/R8/s-lal/LDG/b-PB/R9/b	EB/R8/s-lal/LDG/b-PB/R9/b
PB-EB-NO	None	PB/L9/s-EB/4/b-NO/(1,R)/b	PB/L9/s-EB/4/b-NO/(1,R)/b	PB/L9/s-EB/4/b-NO/(1,R)/b
	None	PB/L8/s-EB/3/b-NO/(1,R)/b	PB/L8/s-EB/3/b-NO/(1,R)/b	PB/L8/s-EB/3/b-NO/(1,R)/b
	None	PB/L7/s-EB/2/b-NO/(1,R)/b	PB/L7/s-EB/2/b-NO/(1,R)/b	PB/L7/s-EB/2/b-NO/(1,R)/b
	None	PB/L6/s-EB/1/b-NO/(1,R)/b	PB/L6/s-EB/1/b-NO/(1,R)/b	PB/L6/s-EB/1/b-NO/(1,R)/b
	None	PB/L5/s-EB/8/b-NO/(1,R)/b	PB/L5/s-EB/8/b-NO/(1,R)/b	PB/L5/s-EB/8/b-NO/(1,R)/b
	None	PB/L4/s-EB/7/b-NO/(1,R)/b	PB/L4/s-EB/7/b-NO/(1,R)/b	PB/L4/s-EB/7/b-NO/(1,R)/b
	Cha-F-000423	PB/L3/s-EB/6/b-NO/(1,R)/b	PB/L3/s-EB/6/b-NO/(1,R)/b	PB/L3/s-EB/6/b-NO/(1,R)/b
	None	PB/L2/s-EB/5/b-NO/(1,R)/b	PB/L2/s-EB/5/b-NO/(1,R)/b	PB/L2/s-EB/5/b-NO/(1,R)/b
	Gad1-F-200375	PB/R2/s-EB/5/b-no/(1,L)/b	PB/R2/s-EB/5/b-no/(1,L)/b	PB/R2/s-EB/5/b-no/(1,L)/b
	None	PB/R3/s-EB/4/b-no/(1,L)/b	PB/R3/s-EB/4/b-no/(1,L)/b	PB/R3/s-EB/4/b-no/(1,L)/b
	Cha-F-200160	PB/R4/s-EB/3/b-no/(1,L)/b	PB/R4/s-EB/3/b-no/(1,L)/b	PB/R4/s-EB/3/b-no/(1,L)/b
	Cha-F-400297	PB/R4/s-EB/3/b-no/(1,L)/b	PB/R4/s-EB/3/b-no/(1,L)/b	PB/R4/s-EB/3/b-no/(1,L)/b
	Gad1-F-600025	PB/R4/s-EB/3/b-no/(1,L)/b	PB/R4/s-EB/3/b-no/(1,L)/b	PB/R4/s-EB/3/b-no/(1,L)/b
	None	PB/R5/s-EB/2/b-no/(1,L)/b	PB/R5/s-EB/2/b-no/(1,L)/b	PB/R5/s-EB/2/b-no/(1,L)/b
	Cha-F-500009	PB/R6/s-EB/1/b-no/(1,L)/b	PB/R6/s-EB/1/b-no/(1,L)/b	PB/R6/s-EB/1/b-no/(1,L)/b
	fru-F-100063	PB/R6/s-EB/1/b-no/(1,L)/b	PB/R6/s-EB/1/b-no/(1,L)/b	PB/R6/s-EB/1/b-no/(1,L)/b
	None	PB/R7/s-EB/8/b-no/(1,L)/b	PB/R7/s-EB/8/b-no/(1,L)/b	PB/R7/s-EB/8/b-no/(1,L)/b
	None	PB/R8/s-EB/7/b-no/(1,L)/b	PB/R8/s-EB/7/b-no/(1,L)/b	PB/R8/s-EB/7/b-no/(1,L)/b
	None	PB/R9/s-EB/6/b-no/(1,L)/b	PB/R9/s-EB/6/b-no/(1,L)/b	PB/R9/s-EB/6/b-no/(1,L)/b
PB-EB-LAL	None	PB/L8/s-EB/4/b-LAL/RVG/b	PB/L8/s-EB/4/b-LAL/RVG/b	PB/L8/s-EB/4/b-LAL/RVG/b
	None	PB/L7/s-EB/3/b-LAL/RDG/b	PB/L7/s-EB/3/b-LAL/RDG/b	PB/L7/s-EB/3/b-LAL/RDG/b
	None	PB/L6/s-EB/2/b-LAL/RVG/b	PB/L6/s-EB/2/b-LAL/RVG/b	PB/L6/s-EB/2/b-LAL/RVG/b
	None	PB/L5/s-EB/1/b-LAL/RDG/b	PB/L5/s-EB/1/b-LAL/RDG/b	PB/L5/s-EB/1/b-LAL/RDG/b
	None	PB/L4/s-EB/8/b-LAL/RVG/b	PB/L4/s-EB/8/b-LAL/RVG/b	PB/L4/s-EB/8/b-LAL/RVG/b
	None	PB/L3/s-EB/7/b-LAL/RDG/b	PB/L3/s-EB/7/b-LAL/RDG/b	PB/L3/s-EB/7/b-LAL/RDG/b
	None	PB/L2/s-EB/6/b-LAL/RVG/b	PB/L2/s-EB/6/b-LAL/RVG/b	PB/L2/s-EB/6/b-LAL/RVG/b
	None	PB/L1/s-EB/5/b-LAL/RDG/b	PB/L1/s-EB/5/b-LAL/RDG/b	PB/L1/s-EB/5/b-LAL/RDG/b
	None	PB/R1/s-EB/5/b-lal/LDG/b	PB/R1/s-EB/5/b-lal/LDG/b	PB/R1/s-EB/5/b-lal/LDG/b
	None	PB/R2/s-EB/4/b-lal/LVG/b	PB/R2/s-EB/4/b-lal/LVG/b	PB/R2/s-EB/4/b-lal/LVG/b
	None	PB/R3/s-EB/3/b-lal/LDG/b	PB/R3/s-EB/3/b-lal/LDG/b	PB/R3/s-EB/3/b-lal/LDG/b
	None	PB/R4/s-EB/2/b-lal/LVG/b	PB/R4/s-EB/2/b-lal/LVG/b	PB/R4/s-EB/2/b-lal/LVG/b
	None	PB/R5/s-EB/1/b-lal/LDG/b	PB/R5/s-EB/1/b-lal/LDG/b	PB/R5/s-EB/1/b-lal/LDG/b
	None	PB/R6/s-EB/8/b-lal/LVG/b	PB/R6/s-EB/8/b-lal/LVG/b	PB/R6/s-EB/8/b-lal/LVG/b
	None	PB/R7/s-EB/7/b-lal/LDG/b	PB/R7/s-EB/7/b-lal/LDG/b	PB/R7/s-EB/7/b-lal/LDG/b
	None	PB/R8/s-EB/6/b-lal/LVG/b	PB/R8/s-EB/6/b-lal/LVG/b	PB/R8/s-EB/6/b-lal/LVG/b
bu-EB	5-HT1B-F-400002	bu/L1/s-EB/LR[1-8]/b	-	-
	5-HT1B-F-500002	bu/L2/s-EB/LR[1-8]/b	-	-
	Cha-F-800070	bu/L3/s-EB/LR[1-8]/b	-	-
	Cha-F-800142	bu/L4/s-EB/LR[1-8]/b	-	-
	Gad1-F-000050	bu/L5/s-EB/LR[1-8]/b	-	EB/[1-8]/s-EB/[1-8]/b-bu/L1/b
	Gad1-F-100200	bu/L6/s-EB/LR[1-8]/b	-	EB/[1-8]/s-EB/[1-8]/b-bu/L2/b
	Gad1-F-200171	bu/L7/s-EB/LR[1-8]/b	-	EB/[1-8]/s-EB/[1-8]/b-bu/L3/b
	Gad1-F-200361	bu/L8/s-EB/LR[1-8]/b	-	-
	Gad1-F-400135	bu/L9/s-EB/LR[1-8]/b	-	-
	Gad1-F-500284	bu/L10/s-EB/LR[1-8]/b	-	-
	Gad1-F-600135	bu/L11/s-EB/LR[1-8]/b	-	-
	Gad1-F-700047	bu/L12/s-EB/LR[1-8]/b	-	-
	Gad1-F-700098	bu/L13/s-EB/LR[1-8]/b	-	-
	Trh-F-300089	bu/L14/s-EB/LR[1-8]/b	-	-
	VGlut-F-200478	bu/L15/s-EB/LR[1-8]/b	-	-
	VGlut-F-200494	bu/L16/s-EB/LR[1-8]/b	-	-
	VGlut-F-300342	bu/L17/s-EB/LR[1-8]/b	-	-
	None	bu/L18/s-EB/LR[1-8]/b	-	-
	None	bu/L19/s-EB/LR[1-8]/b	-	-
	None	bu/L20/s-EB/LR[1-8]/b	-	-
	None	bu/L21/s-EB/LR[1-8]/b	-	-
	None	bu/L22/s-EB/LR[1-8]/b	-	-
	None	bu/L23/s-EB/LR[1-8]/b	-	-
	None	bu/L24/s-EB/LR[1-8]/b	-	-
	None	bu/L25/s-EB/LR[1-8]/b	-	-
	None	bu/L26/s-EB/LR[1-8]/b	-	-
	None	bu/L27/s-EB/LR[1-8]/b	-	-
	None	bu/L28/s-EB/LR[1-8]/b	-	-
	None	bu/L29/s-EB/LR[1-8]/b	-	-
	None	bu/L30/s-EB/LR[1-8]/b	-	-
	None	bu/L31/s-EB/LR[1-8]/b	-	-
	None	bu/L32/s-EB/LR[1-8]/b	-	-
	None	bu/L33/s-EB/LR[1-8]/b	-	-
	None	bu/L34/s-EB/LR[1-8]/b	-	-
	None	bu/L35/s-EB/LR[1-8]/b	-	-
	None	bu/L36/s-EB/LR[1-8]/b	-	-
	None	bu/L37/s-EB/LR[1-8]/b	-	-
	None	bu/L38/s-EB/LR[1-8]/b	-	-
	None	bu/L39/s-EB/LR[1-8]/b	-	-
	None	bu/L40/s-EB/LR[1-8]/b	-	-
	None	bu/L41/s-EB/LR[1-8]/b	-	-
	None	bu/L42/s-EB/LR[1-8]/b	-	-
	None	bu/L43/s-EB/LR[1-8]/b	-	-
	None	bu/L44/s-EB/LR[1-8]/b	-	-
	None	bu/L45/s-EB/LR[1-8]/b	-	-
	None	bu/L46/s-EB/LR[1-8]/b	-	-
	None	bu/L47/s-EB/LR[1-8]/b	-	-
	None	bu/L48/s-EB/LR[1-8]/b	-	-
	None	bu/L49/s-EB/LR[1-8]/b	-	-
	None	bu/L50/s-EB/LR[1-8]/b	-	-
	None	bu/L51/s-EB/LR[1-8]/b	-	-
	None	bu/L52/s-EB/LR[1-8]/b	-	-
	None	bu/L53/s-EB/LR[1-8]/b	-	-
	None	bu/L54/s-EB/LR[1-8]/b	-	-
	None	bu/L55/s-EB/LR[1-8]/b	-	-
	None	bu/L56/s-EB/LR[1-8]/b	-	-
	None	bu/L57/s-EB/LR[1-8]/b	-	-
	None	bu/L58/s-EB/LR[1-8]/b	-	-
	None	bu/L59/s-EB/LR[1-8]/b	-	-
	None	bu/L60/s-EB/LR[1-8]/b	-	-
	None	bu/L61/s-EB/LR[1-8]/b	-	-
	None	bu/L62/s-EB/LR[1-8]/b	-	-
	None	bu/L63/s-EB/LR[1-8]/b	-	-
	None	bu/L64/s-EB/LR[1-8]/b	-	-
	None	bu/L65/s-EB/LR[1-8]/b	-	-
	None	bu/L66/s-EB/LR[1-8]/b	-	-
	None	bu/L67/s-EB/LR[1-8]/b	-	-
	None	bu/L68/s-EB/LR[1-8]/b	-	-
	None	bu/L69/s-EB/LR[1-8]/b	-	-
	None	bu/L70/s-EB/LR[1-8]/b	-	-
	None	bu/L71/s-EB/LR[1-8]/b	-	-
	None	bu/L72/s-EB/LR[1-8]/b	-	-
	None	bu/L73/s-EB/LR[1-8]/b	-	-
	None	bu/L74/s-EB/LR[1-8]/b	-	-
	None	bu/L75/s-EB/LR[1-8]/b	-	-
	None	bu/L76/s-EB/LR[1-8]/b	-	-
	None	bu/L77/s-EB/LR[1-8]/b	-	-
	None	bu/L78/s-EB/LR[1-8]/b	-	-
	None	bu/L79/s-EB/LR[1-8]/b	-	-
	None	bu/L80/s-EB/LR[1-8]/b	-	-
BU-EB	5HT1A-F-300012	BU/R1/s-EB/LR[1-8]/b	-	-
	5HT1A-F-300018	BU/R2/s-EB/LR[1-8]/b	-	-
	Cha-F-300211	BU/R3/s-EB/LR[1-8]/b	-	-
	Cha-F-300435	BU/R4/s-EB/LR[1-8]/b	-	-
	Cha-F-500202	BU/R5/s-EB/LR[1-8]/b	-	-
	Cha-F-800146	BU/R6/s-EB/LR[1-8]/b	-	-
	Gad1-F-000089	BU/R7/s-EB/LR[1-8]/b	-	EB/[1-8]/s-EB/[1-8]/b-BU/R1/s
	Gad1-F-200210	BU/R8/s-EB/LR[1-8]/b	-	EB/[1-8]/s-EB/[1-8]/b-BU/R2/s
	Gad1-F-400190	BU/R9/s-EB/LR[1-8]/b	-	EB/[1-8]/s-EB/[1-8]/b-BU/R3/s
	Gad1-F-400299	BU/R10/s-EB/LR[1-8]/b	-	-
	Gad1-F-400328	BU/R11/s-EB/LR[1-8]/b	-	-
	Gad1-F-500106	BU/R12/s-EB/LR[1-8]/b	-	-
	Gad1-F-500127	BU/R13/s-EB/LR[1-8]/b	-	-
	Gad1-F-500156	BU/R14/s-EB/LR[1-8]/b	-	-
	Gad1-F-500380	BU/R15/s-EB/LR[1-8]/b	-	-
	Gad1-F-900073	BU/R16/s-EB/LR[1-8]/b	-	-
	Trh-F-200122	BU/R17/s-EB/LR[1-8]/b	-	-
	Trh-F-500196	BU/R18/s-EB/LR[1-8]/b	-	-
	VGlut-F-300000	BU/R19/s-EB/LR[1-8]/b	-	-
	VGlut-F-400880	BU/R20/s-EB/LR[1-8]/b	-	-
	VGlut-F-400899	BU/R21/s-EB/LR[1-8]/b	-	-
	VGlut-F-500874	BU/R22/s-EB/LR[1-8]/b	-	-
	None	BU/R23/s-EB/LR[1-8]/b	-	-
	None	BU/R24/s-EB/LR[1-8]/b	-	-
	None	BU/R25/s-EB/LR[1-8]/b	-	-
	None	BU/R26/s-EB/LR[1-8]/b	-	-
	None	BU/R27/s-EB/LR[1-8]/b	-	-
	None	BU/R28/s-EB/LR[1-8]/b	-	-
	None	BU/R29/s-EB/LR[1-8]/b	-	-
	None	BU/R30/s-EB/LR[1-8]/b	-	-
	None	BU/R31/s-EB/LR[1-8]/b	-	-
	None	BU/R32/s-EB/LR[1-8]/b	-	-
	None	BU/R33/s-EB/LR[1-8]/b	-	-
	None	BU/R34/s-EB/LR[1-8]/b	-	-
	None	BU/R35/s-EB/LR[1-8]/b	-	-
	None	BU/R36/s-EB/LR[1-8]/b	-	-
	None	BU/R37/s-EB/LR[1-8]/b	-	-
	None	BU/R38/s-EB/LR[1-8]/b	-	-
	None	BU/R39/s-EB/LR[1-8]/b	-	-
	None	BU/R40/s-EB/LR[1-8]/b	-	-
	None	BU/R41/s-EB/LR[1-8]/b	-	-
	None	BU/R42/s-EB/LR[1-8]/b	-	-
	None	BU/R43/s-EB/LR[1-8]/b	-	-
	None	BU/R44/s-EB/LR[1-8]/b	-	-
	None	BU/R45/s-EB/LR[1-8]/b	-	-
	None	BU/R46/s-EB/LR[1-8]/b	-	-
	None	BU/R47/s-EB/LR[1-8]/b	-	-
	None	BU/R48/s-EB/LR[1-8]/b	-	-
	None	BU/R49/s-EB/LR[1-8]/b	-	-
	None	BU/R50/s-EB/LR[1-8]/b	-	-
	None	BU/R51/s-EB/LR[1-8]/b	-	-
	None	BU/R52/s-EB/LR[1-8]/b	-	-
	None	BU/R53/s-EB/LR[1-8]/b	-	-
	None	BU/R54/s-EB/LR[1-8]/b	-	-
	None	BU/R55/s-EB/LR[1-8]/b	-	-
	None	BU/R56/s-EB/LR[1-8]/b	-	-
	None	BU/R57/s-EB/LR[1-8]/b	-	-
	None	BU/R58/s-EB/LR[1-8]/b	-	-
	None	BU/R59/s-EB/LR[1-8]/b	-	-
	None	BU/R60/s-EB/LR[1-8]/b	-	-
	None	BU/R61/s-EB/LR[1-8]/b	-	-
	None	BU/R62/s-EB/LR[1-8]/b	-	-
	None	BU/R63/s-EB/LR[1-8]/b	-	-
	None	BU/R64/s-EB/LR[1-8]/b	-	-
	None	BU/R65/s-EB/LR[1-8]/b	-	-
	None	BU/R66/s-EB/LR[1-8]/b	-	-
	None	BU/R67/s-EB/LR[1-8]/b	-	-
	None	BU/R68/s-EB/LR[1-8]/b	-	-
	None	BU/R69/s-EB/LR[1-8]/b	-	-
	None	BU/R70/s-EB/LR[1-8]/b	-	-
	None	BU/R71/s-EB/LR[1-8]/b	-	-
	None	BU/R72/s-EB/LR[1-8]/b	-	-
	None	BU/R73/s-EB/LR[1-8]/b	-	-
	None	BU/R74/s-EB/LR[1-8]/b	-	-
	None	BU/R75/s-EB/LR[1-8]/b	-	-
	None	BU/R76/s-EB/LR[1-8]/b	-	-
	None	BU/R77/s-EB/LR[1-8]/b	-	-
	None	BU/R78/s-EB/LR[1-8]/b	-	-
	None	BU/R79/s-EB/LR[1-8]/b	-	-
	None	BU/R80/s-EB/LR[1-8]/b	-	-
PB-FB-NO	None	PB/R2/s-FB/(1,L4)/b-no/(3,LM)/b	-	-
	Gad1-F-700125	PB/R3/s-FB/(1,L4)/b-no/(3,LM)/b	-	-
	Cha-F-300240	PB/R4/s-FB/(1,L3)/b-no/(3,LM)/b	-	-
	E0585-F-300053	PB/R4/s-FB/(1,L3)/b-no/(3,LM)/b	-	-
	Gad1-F-100000	PB/R4/s-FB/(1,L3)/b-no/(3,LM)/b	-	-
	Gad1-F-100116	PB/R4/s-FB/(1,L3)/b-no/(3,LM)/b	-	-
	Gad1-F-300121	PB/R4/s-FB/(1,L3)/b-no/(3,LM)/b	-	-
	Cha-F-000112	PB/R5/s-FB/(1,L2)/b-no/(3,LM)/b	-	-
	VGlut-F-300650	PB/R5/s-FB/(1,L2)/b-no/(3,LM)/b	-	-
	Cha-F-000480	PB/R6/s-FB/(1,L1)|(1,R1)/b-no/(3,LM)/b	-	-
	Cha-F-100055	PB/R6/s-FB/(1,L1)|(1,R1)/b-no/(3,LM)/b	-	-
	Cha-F-400006	PB/R6/s-FB/(1,L1)|(1,R1)/b-no/(3,LM)/b	-	-
	fru-F-600172	PB/R6/s-FB/(1,L1)|(1,R1)/b-no/(3,LM)/b	-	-
	None	PB/R7/s-FB/(1,R2)/b-no/(3,LM)/b	-	-
	Gad1-F-300046	PB/R8/s-FB/(1,R3)/b-no/(3,LM)/b	-	-
	Gad1-F-400063	PB/R8/s-FB/(1,R3)/b-no/(3,LM)/b	-	-
	Gad1-F-600006	PB/R8/s-FB/(1,R3)/b-no/(3,LM)/b	-	-
	Gad1-F-100117	PB/R9/s-FB/(1,R4)/b-no/(3,LM)/b	-	-
	Gad1-F-700037	PB/R9/s-FB/(1,R4)/b-no/(3,LM)/b	-	-
	Gad1-F-800046	PB/R9/s-FB/(1,R4)/b-no/(3,LM)/b	-	-
	Cha-F-400065	PB/L2/s-FB/(1,R4)/b-NO/(3,RM)/b	-	-
	Gad1-F-600077	PB/L2/s-FB/(1,R4)/b-NO/(3,RM)/b	-	-
	VGlut-F-300243	PB/L3/s-FB/(1,R4)/b-NO/(3,RM)/b	-	-
	Cha-F-400144	PB/L4/s-FB/(1,R3)/b-NO/(3,RM)/b	-	-
	Gad1-F-400104	PB/L4/s-FB/(1,R3)/b-NO/(3,RM)/b	-	-
	Gad1-F-700038	PB/L4/s-FB/(1,R3)/b-NO/(3,RM)/b	-	-
	Gad1-F-600105	PB/L4/s-FB/(1,R3)/b-NO/(3,RM)/b	-	-
	Cha-F-000023	PB/L5/s-FB/(1,R2)/b-NO/(3,RM)/b	-	-
	Cha-F-300072	PB/L5/s-FB/(1,R2)/b-NO/(3,RM)/b	-	-
	Cha-F-100429	PB/L6/s-FB/(1,R1)|(1,L1)/b-NO/(3,RM)/b	-	-
	Gad1-F-000056	PB/L6/s-FB/(1,R1)|(1,L1)/b-NO/(3,RM)/b	-	-
	Gad1-F-100063	PB/L6/s-FB/(1,R1)|(1,L1)/b-NO/(3,RM)/b	-	-
	Gad1-F-200146	PB/L6/s-FB/(1,R1)|(1,L1)/b-NO/(3,RM)/b	-	-
	Gad1-F-600102	PB/L6/s-FB/(1,R1)|(1,L1)/b-NO/(3,RM)/b	-	-
	VGlut-F-400789	PB/L6/s-FB/(1,R1)|(1,L1)/b-NO/(3,RM)/b	-	-
	Cha-F-500285	PB/L7/s-FB/(1,L2)/b-NO/(3,RM)/b	-	-
	Gad1-F-300012	PB/L8/s-FB/(1,L3)/b-NO/(3,RM)/b	-	-
	Gad1-F-600003	PB/L8/s-FB/(1,L3)/b-NO/(3,RM)/b	-	-
	Gad1-F-900061	PB/L8/s-FB/(1,L3)/b-NO/(3,RM)/b	-	-
	E0585-F-300049	PB/L9/s-FB/(1,L4)/b-NO/(3,RM)/b	-	-
	E0585-F-400017	PB/L9/s-FB/(1,L4)/b-NO/(3,RM)/b	-	-
	Gad1-F-400005	PB/L9/s-FB/(1,L4)/b-NO/(3,RM)/b	-	-
	Gad1-F-900045	PB/L9/s-FB/(1,L4)/b-NO/(3,RM)/b	-	-
	None	PB/R2/s-FB/(2,L4)/b-no/(3,LA)/b	-	-
	Cha-F-300152	PB/R3/s-FB/(2,L4)/b-no/(3,LA)/b	-	-
	None	PB/R4/s-FB/(2,L3)/b-no/(3,LA)/b	-	-
	None	PB/R5/s-FB/(2,L2)/b-no/(3,LA)/b	-	-
	Gad1-F-000157	PB/R6/s-FB/(2,L1)|(1,R1)/b-no/(3,LA)/b	-	-
	None	PB/R7/s-FB/(2,R2)/b-no/(3,LA)/b	-	-
	None	PB/R8/s-FB/(2,R3)/b-no/(3,LA)/b	-	-
	None	PB/R9/s-FB/(2,R4)/b-no/(3,LA)/b	-	-
	None	PB/L2/s-FB/(2,R4)/b-NO/(3,RA)/b	-	-
	VGlut-F-300517	PB/L3/s-FB/(2,R4)/b-NO/(3,RA)/b	-	-
	Gad1-F-000172	PB/L4/s-FB/(2,R3)/b-NO/(3,RA)/b	-	-
	None	PB/L5/s-FB/(2,R2)/b-NO/(3,RA)/b	-	-
	None	PB/L6/s-FB/(2,R1)|(1,L1)/b-NO/(3,RA)/b	-	-
	Gad1-F-300189	PB/L7/s-FB/(2,L2)/b-NO/(3,RA)/b	-	-
	Cha-F-100206	PB/L8/s-FB/(2,L3)/b-NO/(3,RA)/b	-	-
	None	PB/L9/s-FB/(2,L4)/b-NO/(3,RA)/b	-	-
	Cha-F-400260	PB/R2/s-FB/(3,L4)/b-no/(2,LD)/b	-	-
	None	PB/R2/s-FB/(3,L4)/b-no/(2,LD)/b	-	-
	None	PB/R2/s-FB/(3,L4)/b-no/(2,LV)/b	-	-
	None	PB/R2/s-FB/(3,L4)/b-no/(2,LV)/b	-	-
	None	PB/R3/s-FB/(3,L4)/b-no/(2,LD)/b	-	-
	None	PB/R3/s-FB/(3,L4)/b-no/(2,LV)/b	-	-
	None	PB/R4/s-FB/(3,L3)/b-no/(2,LD)/b	-	-
	None	PB/R4/s-FB/(3,L3)/b-no/(2,LD)/b	-	-
	Cha-F-400025	PB/R4/s-FB/(3,L3)/b-no/(2,LV)/b	-	-
	None	PB/R4/s-FB/(3,L3)/b-no/(2,LV)/b	-	-
	None	PB/R5/s-FB/(3,L2)/b-no/(2,LD)/b	-	-
	None	PB/R5/s-FB/(3,L2)/b-no/(2,LV)/b	-	-
	None	PB/R6/s-FB/(3,L1)|(1,R1)/b-no/(2,LD)/b	-	-
	None	PB/R6/s-FB/(3,L1)|(1,R1)/b-no/(2,LD)/b	-	-
	None	PB/R6/s-FB/(3,L1)|(1,R1)/b-no/(2,LV)/b	-	-
	None	PB/R6/s-FB/(3,L1)|(1,R1)/b-no/(2,LV)/b	-	-
	None	PB/R7/s-FB/(3,R2)/b-no/(2,LD)/b	-	-
	None	PB/R7/s-FB/(3,R2)/b-no/(2,LV)/b	-	-
	None	PB/R8/s-FB/(3,R3)/b-no/(2,LD)/b	-	-
	None	PB/R8/s-FB/(3,R3)/b-no/(2,LD)/b	-	-
	None	PB/R8/s-FB/(3,R3)/b-no/(2,LV)/b	-	-
	None	PB/R9/s-FB/(3,R4)/b-no/(2,LD)/b	-	-
	None	PB/R9/s-FB/(3,R4)/b-no/(2,LV)/b	-	-
	None	PB/L2/s-FB/(3,R4)/b-NO/(2,RD)/b	-	-
	None	PB/L2/s-FB/(3,R4)/b-NO/(2,RV)/b	-	-
	None	PB/L3/s-FB/(3,R4)/b-NO/(2,RD)/b	-	-
	Gad1-F-800139	PB/L3/s-FB/(3,R4)/b-NO/(2,RV)/b	-	-
	None	PB/L4/s-FB/(3,R3)/b-NO/(2,RD)/b	-	-
	None	PB/L4/s-FB/(3,R3)/b-NO/(2,RV)/b	-	-
	None	PB/L5/s-FB/(3,R2)/b-NO/(2,RD)/b	-	-
	None	PB/L5/s-FB/(3,R2)/b-NO/(2,RV)/b	-	-
	None	PB/L6/s-FB/(3,R1)|(1,L1)/b-NO/(2,RD)/b	-	-
	Cha-F-000106	PB/L6/s-FB/(3,R1)|(1,L1)/b-NO/(2,RV)/b	-	-
	None	PB/L7/s-FB/(3,L2)/b-NO/(2,RD)/b	-	-
	None	PB/L7/s-FB/(3,L2)/b-NO/(2,RV)/b	-	-
	None	PB/L8/s-FB/(3,L3)/b-NO/(2,RD)/b	-	-
	None	PB/L8/s-FB/(3,L3)/b-NO/(2,RV)/b	-	-
	None	PB/L9/s-FB/(3,L4)/b-NO/(2,RD)/b	-	-
	None	PB/L9/s-FB/(3,L4)/b-NO/(2,RV)/b	-	-
PB-FB-LAL	Cha-F-000031	PB/L1/s-FB/(2,R[2-3])/s-LAL/RHB/b	-	-
	Cha-F-000482	PB/L1/s-FB/(2,R[2-3])/s-LAL/RHB/b	-	-
	Cha-F-100194	PB/L1/s-FB/(2,R[2-3])/s-LAL/RHB/b	-	-
	Cha-F-100256	PB/L1/s-FB/(2,R[2-3])/s-LAL/RHB/b	-	-
	Cha-F-100328	PB/L1/s-FB/(2,R[2-3])/s-LAL/RHB/b	-	-
	Cha-F-100419	PB/L1/s-FB/(2,R[2-3])/s-LAL/RHB/b	-	-
	Cha-F-200013	PB/L1/s-FB/(2,R[2-3])/s-LAL/RHB/b	-	-
	Cha-F-200134	PB/L1/s-FB/(2,R[2-3])/s-LAL/RHB/b	-	-
	Cha-F-200270	PB/L1/s-FB/(2,R[2-3])/s-LAL/RHB/b	-	-
	Cha-F-200401	PB/L1/s-FB/(2,R[2-3])/s-LAL/RHB/b	-	-
	Cha-F-300160	PB/L1/s-FB/(2,R[2-3])/s-LAL/RHB/b	-	-
	Cha-F-300233	PB/L1/s-FB/(2,R[2-3])/s-LAL/RHB/b	-	-
	Cha-F-300365	PB/L1/s-FB/(2,R[2-3])/s-LAL/RHB/b	-	-
	Cha-F-300383	PB/L1/s-FB/(2,R[2-3])/s-LAL/RHB/b	-	-
	Cha-F-300397	PB/L1/s-FB/(2,R[2-3])/s-LAL/RHB/b	-	-
	Cha-F-400098	PB/L1/s-FB/(2,R[2-3])/s-LAL/RHB/b	-	-
	Cha-F-400170	PB/L1/s-FB/(2,R[2-3])/s-LAL/RHB/b	-	-
	Cha-F-500028	PB/L1/s-FB/(2,R[2-3])/s-LAL/RHB/b	-	-
	Cha-F-500043	PB/L1/s-FB/(2,R[2-3])/s-LAL/RHB/b	-	-
	Cha-F-500106	PB/L1/s-FB/(2,R[2-3])/s-LAL/RHB/b	-	-
	Cha-F-500150	PB/L1/s-FB/(2,R[2-3])/s-LAL/RHB/b	-	-
	Cha-F-500224	PB/L1/s-FB/(2,R[2-3])/s-LAL/RHB/b	-	-
	Cha-F-500257	PB/L1/s-FB/(2,R[2-3])/s-LAL/RHB/b	-	-
	Cha-F-500258	PB/L1/s-FB/(2,R[2-3])/s-LAL/RHB/b	-	-
	Cha-F-700226	PB/L1/s-FB/(2,R[2-3])/s-LAL/RHB/b	-	-
	Cha-F-800032	PB/L1/s-FB/(2,R[2-3])/s-LAL/RHB/b	-	-
	None	PB/L1/s-FB/(2,R[2-3])/s-LAL/RHB/b	-	-
	None	PB/L1/s-FB/(2,R[2-3])/s-LAL/RHB/b	-	-
	Gad1-F-000004	PB/L1/s-FB/(2,R[2-3])/s-LAL/RHB/b	-	-
	Gad1-F-000120	PB/L1/s-FB/(2,R[2-3])/s-LAL/RHB/b	-	-
	Gad1-F-200106	PB/L1/s-FB/(2,R[2-3])/s-LAL/RHB/b	-	-
	Gad1-F-300029	PB/L1/s-FB/(2,R[2-3])/s-LAL/RHB/b	-	-
	Gad1-F-500122	PB/L1/s-FB/(2,R[2-3])/s-LAL/RHB/b	-	-
	Gad1-F-700024	PB/L1/s-FB/(2,R[2-3])/s-LAL/RHB/b	-	-
	Gad1-F-800084	PB/L1/s-FB/(2,R[2-3])/s-LAL/RHB/b	-	-
	Gad1-F-300196	PB/L2/s-FB/(2,R[1-2])/s-LAL/RHB/b	-	-
	Gad1-F-600033	PB/L3/s-FB/(2,[R1,L1])/s-LAL/RHB/b	-	-
	None	PB/L4/s-FB/(2,L[1-2])/s-LAL/RHB/b	-	-
	Gad1-F-900011	PB/L5/s-FB/(2,L[2-3])/s-LAL/RHB/b	-	-
	Cha-F-000098	PB/L6/s-FB/(2,L[3-4])/s-LAL/RHB/b	-	-
	Cha-F-000162	PB/L6/s-FB/(2,L[3-4])/s-LAL/RHB/b	-	-
	Cha-F-000393	PB/L6/s-FB/(2,L[3-4])/s-LAL/RHB/b	-	-
	Cha-F-000475	PB/L6/s-FB/(2,L[3-4])/s-LAL/RHB/b	-	-
	Cha-F-100151	PB/L6/s-FB/(2,L[3-4])/s-LAL/RHB/b	-	-
	Cha-F-200136	PB/L6/s-FB/(2,L[3-4])/s-LAL/RHB/b	-	-
	Cha-F-200206	PB/L6/s-FB/(2,L[3-4])/s-LAL/RHB/b	-	-
	Cha-F-300170	PB/L6/s-FB/(2,L[3-4])/s-LAL/RHB/b	-	-
	Cha-F-400150	PB/L6/s-FB/(2,L[3-4])/s-LAL/RHB/b	-	-
	Cha-F-500266	PB/L6/s-FB/(2,L[3-4])/s-LAL/RHB/b	-	-
	Cha-F-600101	PB/L6/s-FB/(2,L[3-4])/s-LAL/RHB/b	-	-
	Cha-F-600184	PB/L6/s-FB/(2,L[3-4])/s-LAL/RHB/b	-	-
	Cha-F-600215	PB/L6/s-FB/(2,L[3-4])/s-LAL/RHB/b	-	-
	Cha-F-600230	PB/L6/s-FB/(2,L[3-4])/s-LAL/RHB/b	-	-
	Cha-F-600246	PB/L6/s-FB/(2,L[3-4])/s-LAL/RHB/b	-	-
	Cha-F-700086	PB/L6/s-FB/(2,L[3-4])/s-LAL/RHB/b	-	-
	Cha-F-700269	PB/L6/s-FB/(2,L[3-4])/s-LAL/RHB/b	-	-
	Cha-F-800102	PB/L6/s-FB/(2,L[3-4])/s-LAL/RHB/b	-	-
	Cha-F-900039	PB/L6/s-FB/(2,L[3-4])/s-LAL/RHB/b	-	-
	Gad1-F-300203	PB/L6/s-FB/(2,L[3-4])/s-LAL/RHB/b	-	-
	Gad1-F-400064	PB/L6/s-FB/(2,L[3-4])/s-LAL/RHB/b	-	-
	Gad1-F-500083	PB/L6/s-FB/(2,L[3-4])/s-LAL/RHB/b	-	-
	Gad1-F-600018	PB/L6/s-FB/(2,L[3-4])/s-LAL/RHB/b	-	-
	Gad1-F-600107	PB/L6/s-FB/(2,L[3-4])/s-LAL/RHB/b	-	-
	Gad1-F-700061	PB/L6/s-FB/(2,L[3-4])/s-LAL/RHB/b	-	-
	Gad1-F-700087	PB/L6/s-FB/(2,L[3-4])/s-LAL/RHB/b	-	-
	Gad1-F-800076	PB/L6/s-FB/(2,L[3-4])/s-LAL/RHB/b	-	-
	Gad1-F-800087	PB/L6/s-FB/(2,L[3-4])/s-LAL/RHB/b	-	-
	None	PB/L7/s-FB/(2,L[3-4])/s-LAL/RHB/b	-	-
	None	PB/R7/s-FB/(2,R[3-4])/s-lal/LHB/b	-	-
	Cha-F-000070	PB/R6/s-FB/(2,R[3-4])/s-lal/LHB/b	-	-
	Cha-F-100250	PB/R6/s-FB/(2,R[3-4])/s-lal/LHB/b	-	-
	Cha-F-100411	PB/R6/s-FB/(2,R[3-4])/s-lal/LHB/b	-	-
	Cha-F-200046	PB/R6/s-FB/(2,R[3-4])/s-lal/LHB/b	-	-
	Cha-F-200183	PB/R6/s-FB/(2,R[3-4])/s-lal/LHB/b	-	-
	Cha-F-200389	PB/R6/s-FB/(2,R[3-4])/s-lal/LHB/b	-	-
	Cha-F-300172	PB/R6/s-FB/(2,R[3-4])/s-lal/LHB/b	-	-
	Cha-F-300229	PB/R6/s-FB/(2,R[3-4])/s-lal/LHB/b	-	-
	Cha-F-400157	PB/R6/s-FB/(2,R[3-4])/s-lal/LHB/b	-	-
	Cha-F-600028	PB/R6/s-FB/(2,R[3-4])/s-lal/LHB/b	-	-
	Cha-F-700215	PB/R6/s-FB/(2,R[3-4])/s-lal/LHB/b	-	-
	Cha-F-700238	PB/R6/s-FB/(2,R[3-4])/s-lal/LHB/b	-	-
	Cha-F-800027	PB/R6/s-FB/(2,R[3-4])/s-lal/LHB/b	-	-
	Cha-F-800071	PB/R6/s-FB/(2,R[3-4])/s-lal/LHB/b	-	-
	Cha-F-900028	PB/R6/s-FB/(2,R[3-4])/s-lal/LHB/b	-	-
	Gad1-F-000084	PB/R6/s-FB/(2,R[3-4])/s-lal/LHB/b	-	-
	Gad1-F-100004	PB/R6/s-FB/(2,R[3-4])/s-lal/LHB/b	-	-
	Gad1-F-200008	PB/R6/s-FB/(2,R[3-4])/s-lal/LHB/b	-	-
	Gad1-F-200018	PB/R6/s-FB/(2,R[3-4])/s-lal/LHB/b	-	-
	Gad1-F-300057	PB/R6/s-FB/(2,R[3-4])/s-lal/LHB/b	-	-
	Gad1-F-300134	PB/R6/s-FB/(2,R[3-4])/s-lal/LHB/b	-	-
	Gad1-F-400035	PB/R6/s-FB/(2,R[3-4])/s-lal/LHB/b	-	-
	Gad1-F-700062	PB/R6/s-FB/(2,R[3-4])/s-lal/LHB/b	-	-
	None	PB/R5/s-FB/(2,R[2-3])/s-lal/LHB/b	-	-
	None	PB/R4/s-FB/(2,R[1-2])/s-lal/LHB/b	-	-
	Cha-F-200009	PB/R3/s-FB/(2,[L1,R1])/s-lal/LHB/b	-	-
	Gad1-F-300027	PB/R3/s-FB/(2,[L1,R1])/s-lal/LHB/b	-	-
	Cha-F-500139	PB/R2/s-FB/(2,L[1-2])/s-lal/LHB/b	-	-
	Cha-F-000125	PB/R1/s-FB/(2,L[2-3])/s-lal/LHB/b	-	-
	Cha-F-100433	PB/R1/s-FB/(2,L[2-3])/s-lal/LHB/b	-	-
	Cha-F-200194	PB/R1/s-FB/(2,L[2-3])/s-lal/LHB/b	-	-
	Cha-F-200382	PB/R1/s-FB/(2,L[2-3])/s-lal/LHB/b	-	-
	Cha-F-300197	PB/R1/s-FB/(2,L[2-3])/s-lal/LHB/b	-	-
	Cha-F-300323	PB/R1/s-FB/(2,L[2-3])/s-lal/LHB/b	-	-
	Cha-F-300338	PB/R1/s-FB/(2,L[2-3])/s-lal/LHB/b	-	-
	Cha-F-300348	PB/R1/s-FB/(2,L[2-3])/s-lal/LHB/b	-	-
	Cha-F-600092	PB/R1/s-FB/(2,L[2-3])/s-lal/LHB/b	-	-
	Cha-F-700146	PB/R1/s-FB/(2,L[2-3])/s-lal/LHB/b	-	-
	Cha-F-700198	PB/R1/s-FB/(2,L[2-3])/s-lal/LHB/b	-	-
	Gad1-F-000054	PB/R1/s-FB/(2,L[2-3])/s-lal/LHB/b	-	-
	Gad1-F-300040	PB/R1/s-FB/(2,L[2-3])/s-lal/LHB/b	-	-
	Gad1-F-300066	PB/R1/s-FB/(2,L[2-3])/s-lal/LHB/b	-	-
	Gad1-F-300111	PB/R1/s-FB/(2,L[2-3])/s-lal/LHB/b	-	-
	Gad1-F-300147	PB/R1/s-FB/(2,L[2-3])/s-lal/LHB/b	-	-
	Gad1-F-400077	PB/R1/s-FB/(2,L[2-3])/s-lal/LHB/b	-	-
	Gad1-F-500065	PB/R1/s-FB/(2,L[2-3])/s-lal/LHB/b	-	-
	Gad1-F-500109	PB/R1/s-FB/(2,L[2-3])/s-lal/LHB/b	-	-
	Gad1-F-500126	PB/R1/s-FB/(2,L[2-3])/s-lal/LHB/b	-	-
	Gad1-F-600050	PB/R1/s-FB/(2,L[2-3])/s-lal/LHB/b	-	-
	Gad1-F-800059	PB/R1/s-FB/(2,L[2-3])/s-lal/LHB/b	-	-
	None	PB/R1/s-FB/(2,R[3-4])/s-LAL/RHB/b	-	-
	None	PB/L1/s-FB/(2,L[3-4])/s-lal/LHB/b	-	-
	None	PB/L1|R1/s-FB/(2,R[3-4])/s-LAL/RHB/b	-	-
	None	PB/R1|L1/s-FB/(2,L[3-4])/s-lal/LHB/b	-	-
	None	PB/L1/s-FB/([1-4],L[3-4])/s-lal/LHB/b	-	-
	None	PB/R1/s-FB/([1-4],R[3-4])/s-LAL/RHB/b	-	-
	None	PB/L1|R1/s-FB/([1-4],R[2-3])/s-LAL/RHB/b	-	-
	None	PB/L1|R1/s-FB/([1-4],L[2-3])/s-lal/LHB/b	-	-
	None	PB/L1/s-FB/([1-4],R[1-2])/s-LAL/RHB/b	-	-
	Cha-F-100235	PB/L2/s-FB/([1-4],[L1,R1])/s-LAL/RHB/b	-	-
	Gad1-F-700185	PB/L2/s-FB/([1-4],[L1,R1])/s-LAL/RHB/b	-	-
	None	PB/L3/s-FB/([1-4],L[1-2])/s-LAL/RHB/b	-	-
	Cha-F-000109	PB/L4/s-FB/([1-4],L[2-3])/s-LAL/RHB/b	-	-
	Cha-F-500172	PB/L4/s-FB/([1-4],L[2-3])/s-LAL/RHB/b	-	-
	Gad1-F-400280	PB/L4/s-FB/([1-4],L[2-3])/s-LAL/RHB/b	-	-
	Cha-F-300234	PB/L5/s-FB/([1-4],L[3-4])/s-LAL/RHB/b	-	-
	Gad1-F-100246	PB/L5/s-FB/([1-4],L[3-4])/s-LAL/RHB/b	-	-
	Cha-F-000155	PB/L6/s-FB/([1-4],L[3-4])/s-LAL/RHB/b	-	-
	Cha-F-000203	PB/L6/s-FB/([1-4],L[3-4])/s-LAL/RHB/b	-	-
	Cha-F-000254	PB/L6/s-FB/([1-4],L[3-4])/s-LAL/RHB/b	-	-
	Cha-F-100065	PB/L6/s-FB/([1-4],L[3-4])/s-LAL/RHB/b	-	-
	Cha-F-200023	PB/L6/s-FB/([1-4],L[3-4])/s-LAL/RHB/b	-	-
	Cha-F-200277	PB/L6/s-FB/([1-4],L[3-4])/s-LAL/RHB/b	-	-
	Cha-F-300309	PB/L6/s-FB/([1-4],L[3-4])/s-LAL/RHB/b	-	-
	Cha-F-500188	PB/L6/s-FB/([1-4],L[3-4])/s-LAL/RHB/b	-	-
	Cha-F-500217	PB/L6/s-FB/([1-4],L[3-4])/s-LAL/RHB/b	-	-
	Cha-F-600244	PB/L6/s-FB/([1-4],L[3-4])/s-LAL/RHB/b	-	-
	Cha-F-700138	PB/L6/s-FB/([1-4],L[3-4])/s-LAL/RHB/b	-	-
	Gad1-F-300063	PB/L6/s-FB/([1-4],L[3-4])/s-LAL/RHB/b	-	-
	Gad1-F-400032	PB/L6/s-FB/([1-4],L[3-4])/s-LAL/RHB/b	-	-
	Gad1-F-400150	PB/L6/s-FB/([1-4],L[3-4])/s-LAL/RHB/b	-	-
	Gad1-F-600116	PB/L6/s-FB/([1-4],L[3-4])/s-LAL/RHB/b	-	-
	Gad1-F-700081	PB/L6/s-FB/([1-4],L[3-4])/s-LAL/RHB/b	-	-
	Gad1-F-800025	PB/L6/s-FB/([1-4],L[3-4])/s-LAL/RHB/b	-	-
	Cha-F-000103	PB/R6/s-FB/([1-4],R[3-4])/s-lal/LHB/b	-	-
	Cha-F-000134	PB/R6/s-FB/([1-4],R[3-4])/s-lal/LHB/b	-	-
	Cha-F-000147	PB/R6/s-FB/([1-4],R[3-4])/s-lal/LHB/b	-	-
	Cha-F-000195	PB/R6/s-FB/([1-4],R[3-4])/s-lal/LHB/b	-	-
	Cha-F-000381	PB/R6/s-FB/([1-4],R[3-4])/s-lal/LHB/b	-	-
	Cha-F-000426	PB/R6/s-FB/([1-4],R[3-4])/s-lal/LHB/b	-	-
	Cha-F-100033	PB/R6/s-FB/([1-4],R[3-4])/s-lal/LHB/b	-	-
	Cha-F-100130	PB/R6/s-FB/([1-4],R[3-4])/s-lal/LHB/b	-	-
	Cha-F-100242	PB/R6/s-FB/([1-4],R[3-4])/s-lal/LHB/b	-	-
	Cha-F-200198	PB/R6/s-FB/([1-4],R[3-4])/s-lal/LHB/b	-	-
	Cha-F-300100	PB/R6/s-FB/([1-4],R[3-4])/s-lal/LHB/b	-	-
	Cha-F-300132	PB/R6/s-FB/([1-4],R[3-4])/s-lal/LHB/b	-	-
	Cha-F-300253	PB/R6/s-FB/([1-4],R[3-4])/s-lal/LHB/b	-	-
	Cha-F-300410	PB/R6/s-FB/([1-4],R[3-4])/s-lal/LHB/b	-	-
	Cha-F-400017	PB/R6/s-FB/([1-4],R[3-4])/s-lal/LHB/b	-	-
	Cha-F-500108	PB/R6/s-FB/([1-4],R[3-4])/s-lal/LHB/b	-	-
	Cha-F-600083	PB/R6/s-FB/([1-4],R[3-4])/s-lal/LHB/b	-	-
	Cha-F-600233	PB/R6/s-FB/([1-4],R[3-4])/s-lal/LHB/b	-	-
	Cha-F-700126	PB/R6/s-FB/([1-4],R[3-4])/s-lal/LHB/b	-	-
	Cha-F-700150	PB/R6/s-FB/([1-4],R[3-4])/s-lal/LHB/b	-	-
	Cha-F-700289	PB/R6/s-FB/([1-4],R[3-4])/s-lal/LHB/b	-	-
	Gad1-F-000059	PB/R6/s-FB/([1-4],R[3-4])/s-lal/LHB/b	-	-
	Gad1-F-000091	PB/R6/s-FB/([1-4],R[3-4])/s-lal/LHB/b	-	-
	Gad1-F-000100	PB/R6/s-FB/([1-4],R[3-4])/s-lal/LHB/b	-	-
	Gad1-F-100065	PB/R6/s-FB/([1-4],R[3-4])/s-lal/LHB/b	-	-
	Gad1-F-200044	PB/R6/s-FB/([1-4],R[3-4])/s-lal/LHB/b	-	-
	Gad1-F-200145	PB/R6/s-FB/([1-4],R[3-4])/s-lal/LHB/b	-	-
	Gad1-F-300123	PB/R6/s-FB/([1-4],R[3-4])/s-lal/LHB/b	-	-
	Gad1-F-300132	PB/R6/s-FB/([1-4],R[3-4])/s-lal/LHB/b	-	-
	Gad1-F-400148	PB/R6/s-FB/([1-4],R[3-4])/s-lal/LHB/b	-	-
	Gad1-F-500035	PB/R6/s-FB/([1-4],R[3-4])/s-lal/LHB/b	-	-
	Gad1-F-500093	PB/R6/s-FB/([1-4],R[3-4])/s-lal/LHB/b	-	-
	Gad1-F-700107	PB/R6/s-FB/([1-4],R[3-4])/s-lal/LHB/b	-	-
	Gad1-F-800013	PB/R6/s-FB/([1-4],R[3-4])/s-lal/LHB/b	-	-
	Cha-F-000499	PB/R5/s-FB/([1-4],R[3-4])/s-lal/LHB/b	-	-
	Cha-F-500295	PB/R5/s-FB/([1-4],R[3-4])/s-lal/LHB/b	-	-
	Gad1-F-000330	PB/R5/s-FB/([1-4],R[3-4])/s-lal/LHB/b	-	-
	Cha-F-200207	PB/R4/s-FB/([1-4],R[2-3])/s-lal/LHB/b	-	-
	Gad1-F-000180	PB/R3/s-FB/([1-4],R[1-2])/s-lal/LHB/b	-	-
	Gad1-F-400017	PB/R3/s-FB/([1-4],R[1-2])/s-lal/LHB/b	-	-
	Cha-F-300364	PB/R2/s-FB/([1-4],[L1,R1])/s-lal/LHB/b	-	-
	Gad1-F-100220	PB/R2/s-FB/([1-4],[L1,R1])/s-lal/LHB/b	-	-
	Gad1-F-100242	PB/R2/s-FB/([1-4],[L1,R1])/s-lal/LHB/b	-	-
	Gad1-F-700039	PB/R2/s-FB/([1-4],[L1,R1])/s-lal/LHB/b	-	-
	Cha-F-000376	PB/R1/s-FB/([1-4],L[1-2])/s-lal/LHB/b	-	-
	None	PB/L3/s-FB/([1-4],L[3-4])/s-lal/LHB/b-LAL/RHB/b	-	-
	None	PB/L1/s-FB/([1-4],L[1-2])/s-lal/LHB/b-LAL/RHB/b	-	-
	None	PB/R1/s-FB/([1-4],R[1-2])/s-lal/LHB/b-LAL/RHB/b	-	-
	None	PB/R3/s-FB/([1-4],R[3-4])/s-lal/LHB/b-LAL/RHB/b	-	-
