# Supplementary figures and images for: Accelerating with FlyBrainLab the discovery of the functional logic of the Drosophila brain in the connectomic and synaptomic era
Source: eLife journal article supplement (doi:10.7554/elife.62362), 2021-02-22

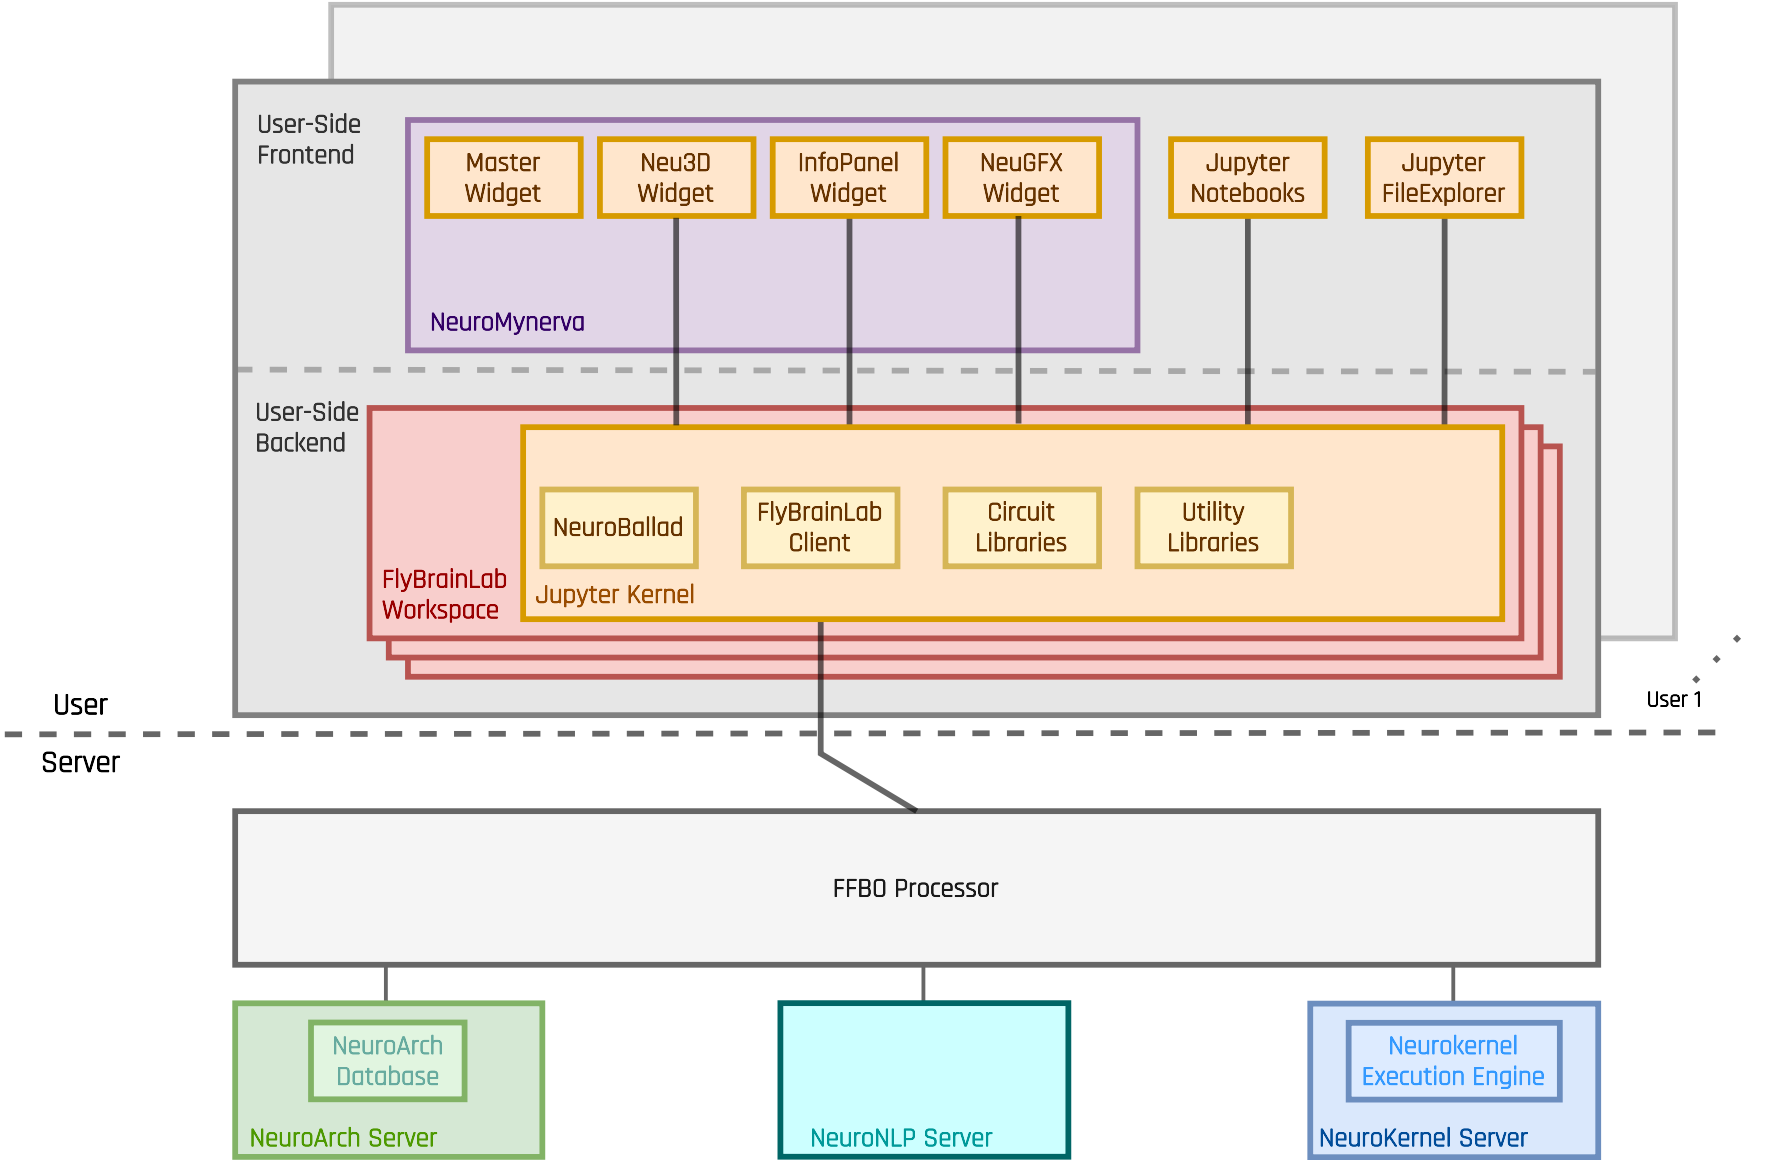

Supplement: supp [file elife-62362-supp-v1.zip › elife_poa_e62362_Appendix_1_figure_1.pdf]

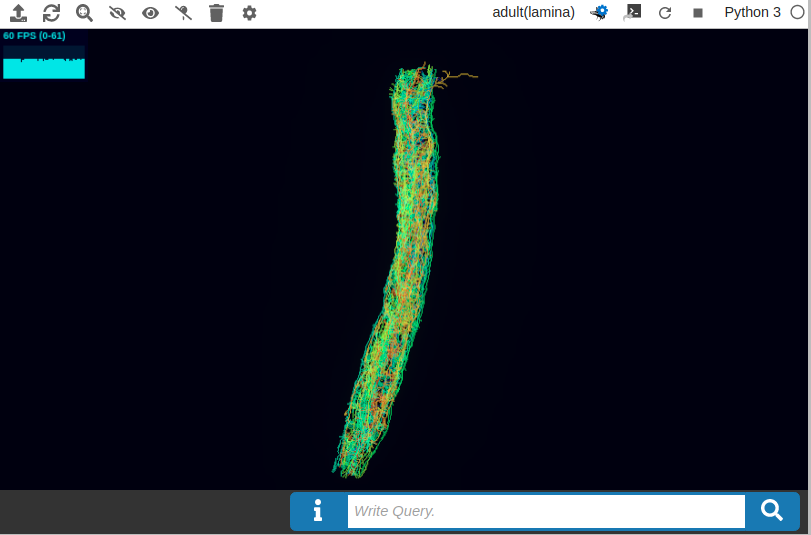

Supplement: supp [file elife-62362-supp-v1.zip › elife_poa_e62362_Appendix_4_figure_1.png]

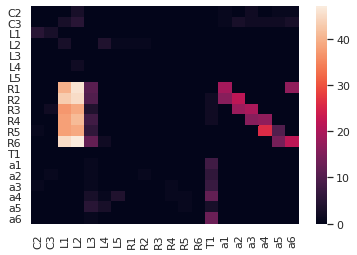

Supplement: supp [file elife-62362-supp-v1.zip › elife_poa_e62362_Appendix_4_figure_2.png]

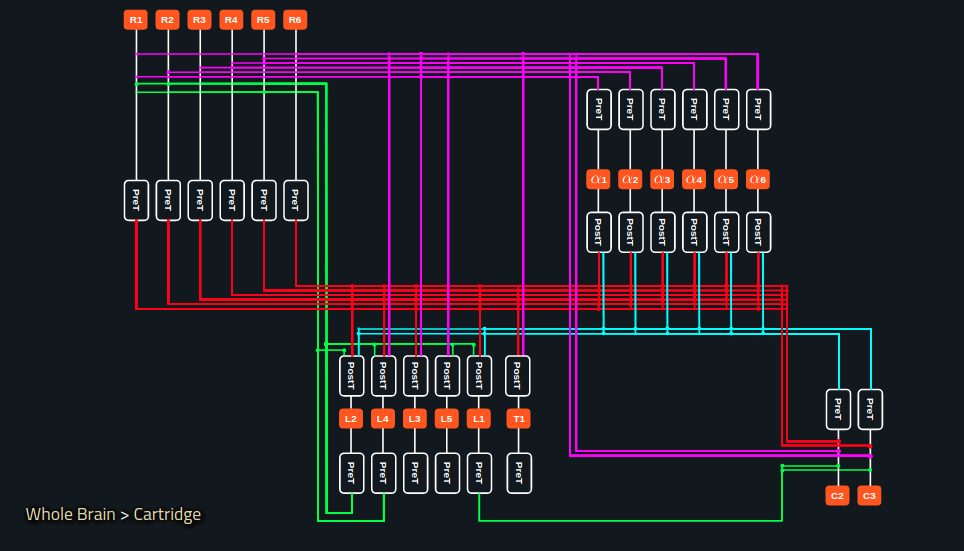

Supplement: supp [file elife-62362-supp-v1.zip › elife_poa_e62362_Appendix_4_figure_3.png]

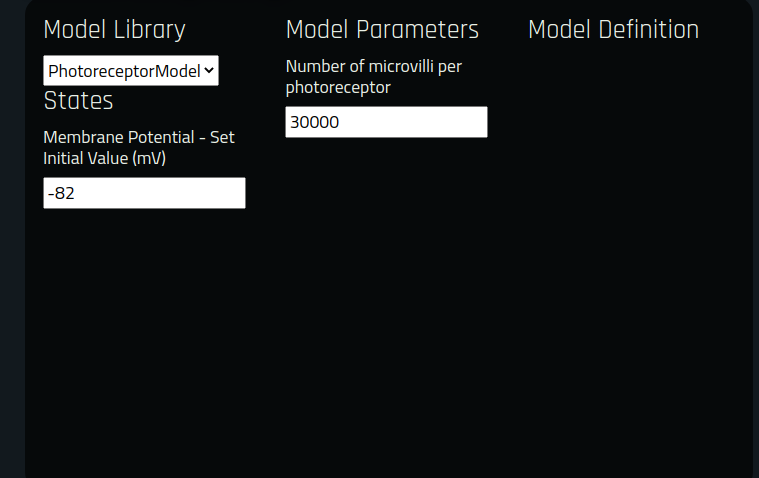

Supplement: supp [file elife-62362-supp-v1.zip › elife_poa_e62362_Appendix_4_figure_4.png]

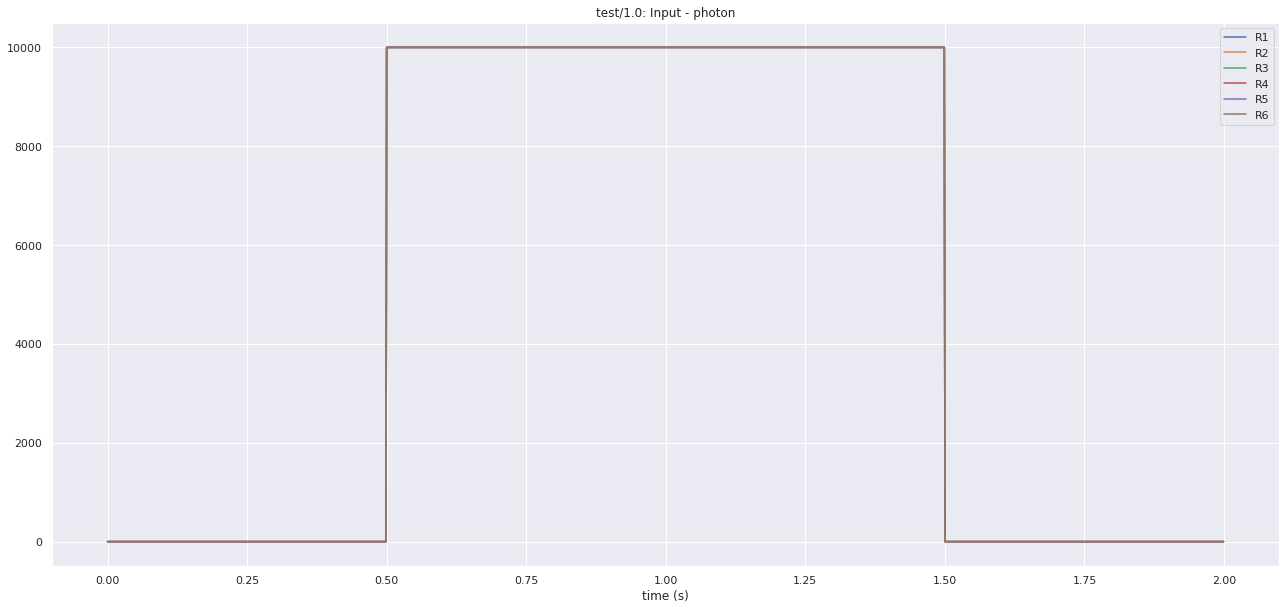

Supplement: supp [file elife-62362-supp-v1.zip › elife_poa_e62362_Appendix_4_figure_5.png]

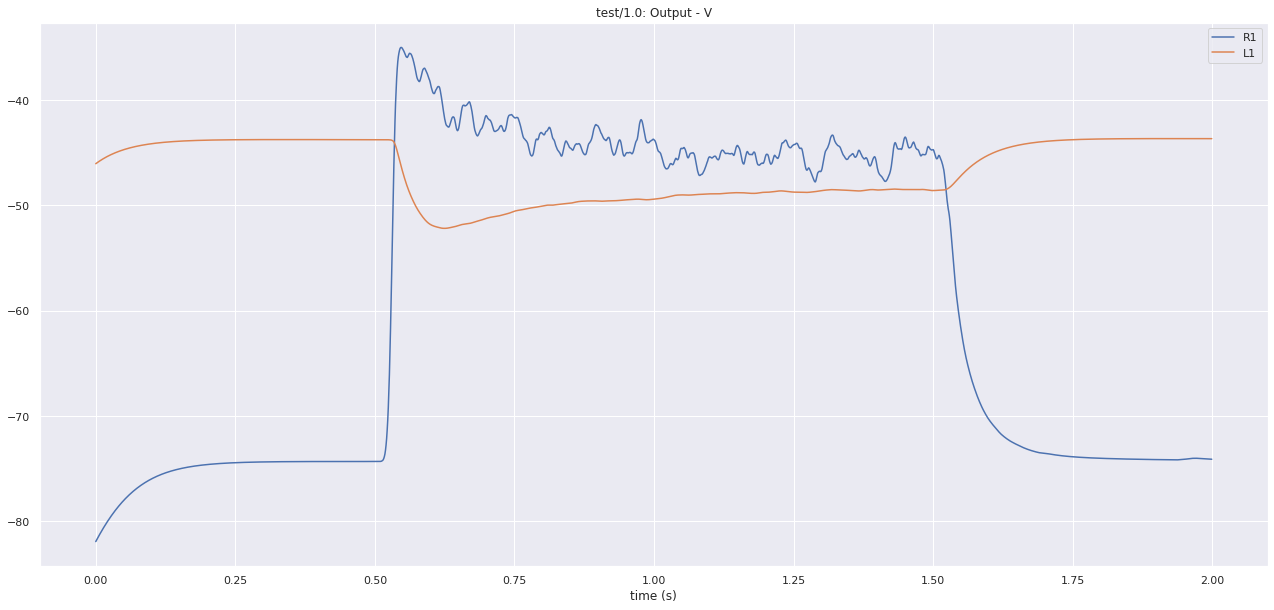

Supplement: supp [file elife-62362-supp-v1.zip › elife_poa_e62362_Appendix_4_figure_6.png]

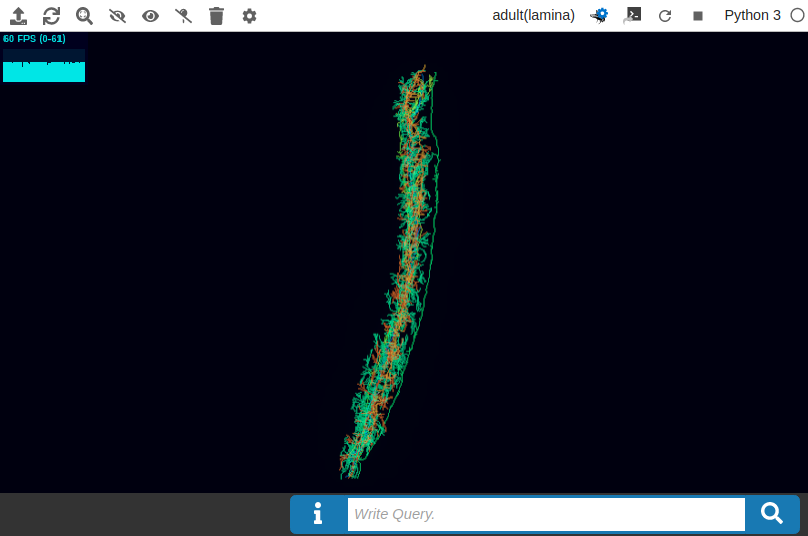

Supplement: supp [file elife-62362-supp-v1.zip › elife_poa_e62362_Appendix_4_figure_7.png]

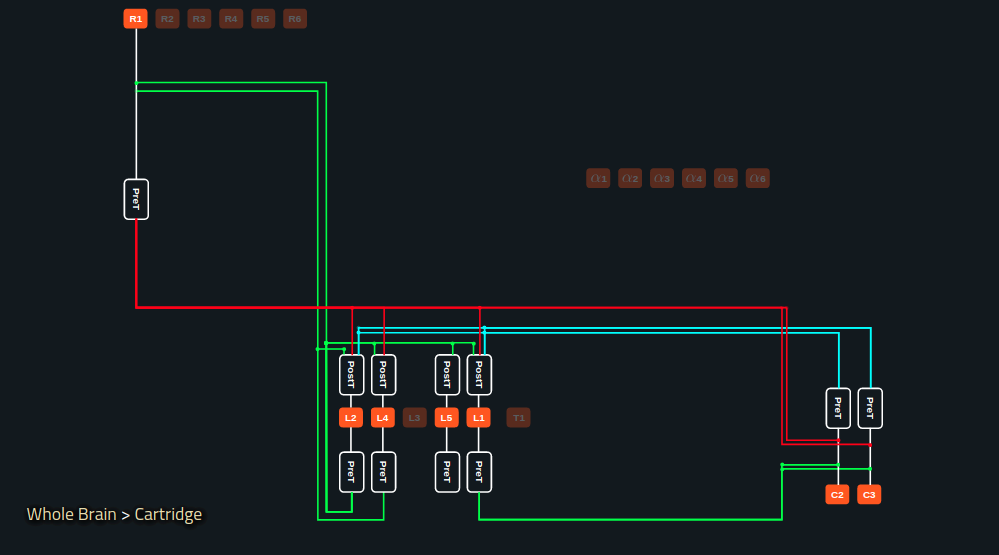

Supplement: supp [file elife-62362-supp-v1.zip › elife_poa_e62362_Appendix_4_figure_8.png]

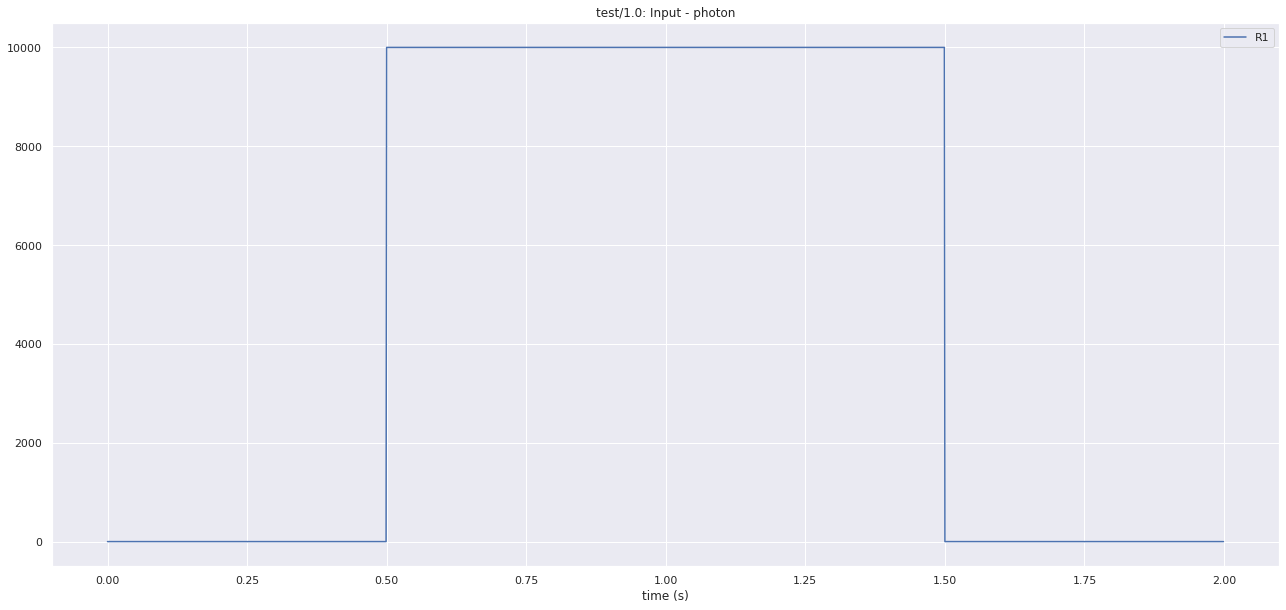

Supplement: supp [file elife-62362-supp-v1.zip › elife_poa_e62362_Appendix_4_figure_9.png]

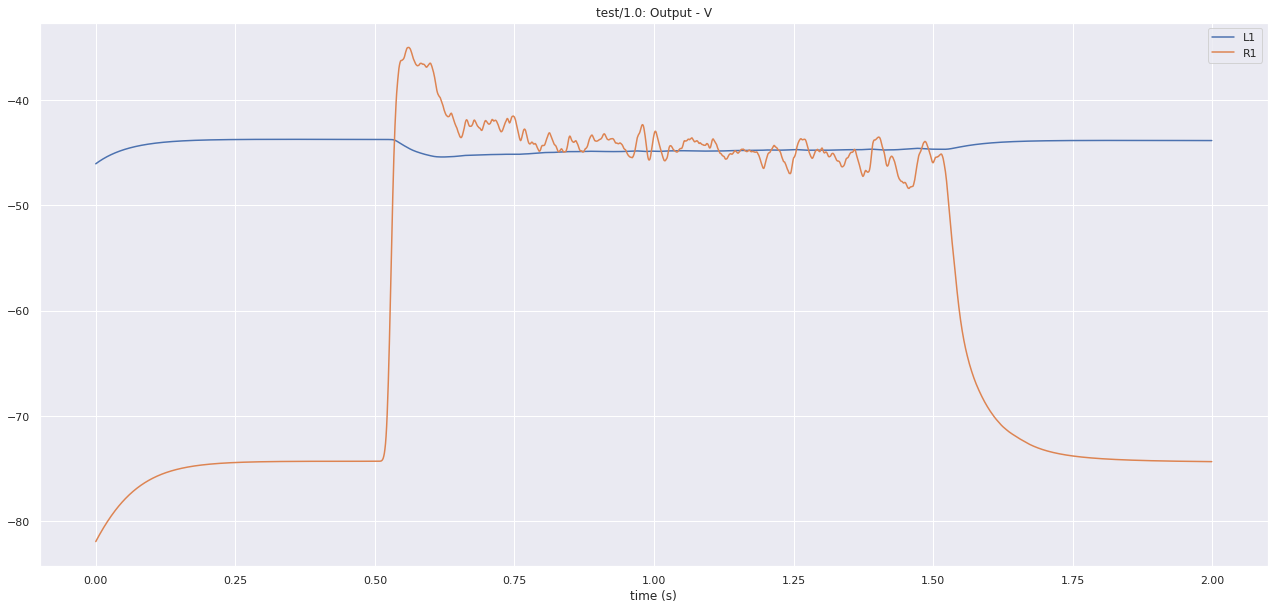

Supplement: supp [file elife-62362-supp-v1.zip › elife_poa_e62362_Appendix_4_figure_10.png]
